# Supplementary material for: Mortality in Children Aged 0-9 Years: A Nationwide Cohort Study from Three Nordic Countries
Source: PLoS One. 2016 Jan 8;11(1):e0146669. doi: 10.1371/journal.pone.0146669 (PMC4706349; doi:10.1371/journal.pone.0146669)
Supplement: S1 Table — (XLSX) [file pone.0146669.s001.xlsx]

## Sheet: S1a Table Frequency
Table1 The number of deaths by causes of death in Denmark, Sweden and Finland																			Table2 The number of deaths by causes of death in Denmark and Sweden																			Table3 The number of deaths by causes of death in Finland
Cause of death	0-27d	28-364d	1y-	2y-	3y-	4y-	5y-	6y-	7y-	8y-	9y-	<1y	1-4y	5-9y	1-9y	Total			Cause of death	0-27d	28-364d	1y-	2y-	3y-	4y-	5y-	6y-	7y-	8y-	9y-	<1y	1-4y	5-9y	1-9y	Total			Cause of death	0-27d	28-364d	1y-	2y-	3y-	4y-	5y-	6y-	7y-	8y-	9y-
Unnatural death from diseases or medical conditions																			Unnatural death from diseases or medical conditions																			Unnatural death from diseases or medical conditions
Infectious and parasitic disease	353	466	199	124	74	48	31	22	19	10	13	819	445	95	540	1359			Infectious and parasitic disease	339	415	181	111	64	37	25	19	16	8	13	754	393	81	474	1228			Infectious and parasitic disease	14	51	18	13	10	11	6	3	3	2	0
Meningococcal infection£	6	88	73	57	35	22	15	5	3	6	4	94	187	33	220	314			Meningococcal infection£	6	88	73	57	35	22	15	5	3	6	4	94	187	33	220	314			Meningococcal infection£
Neoplasms	134	235	296	264	267	273	236	228	185	181	174	369	1100	1004	2104	2473			Neoplasms	100	206	252	226	231	240	194	195	163	156	149	306	949	857	1806	2112			Neoplasms	34	29	44	38	36	33	42	33	22	25	25
Leukemia¶ £	13	58	90	72	76	76	50	70	63	48	46	71	314	277	591	662			Leukemia¶ £	13	58	90	72	76	76	50	70	63	48	46	71	314	277	591	662			Leukemia¶ £	0	0	0	0	0	0	0	0	0	0	0
Brain and other central nervous system tumours¶ £	11	66	92	71	74	78	59	62	50	57	54	77	315	282	597	674			Brain and other central nervous system tumours¶ £	11	66	92	71	74	78	59	62	50	57	54	77	315	282	597	674			Brain and other central nervous system tumours¶ £	0	0	0	0	0	0	0	0	0	0	0
other causes of neoplams¶ £	76	82	70	83	81	86	85	63	50	51	49	158	320	298	618	776			other causes of neoplams¶ £	76	82	70	83	81	86	85	63	50	51	49	158	320	298	618	776			other causes of neoplams¶ £	0	0	0	0	0	0	0	0	0	0	0
Endocrine, nutritional and metabolic diseases	214	294	134	70	66	40	35	26	24	20	34	508	310	139	449	957			Endocrine, nutritional and metabolic diseases	168	243	114	62	59	33	24	21	18	14	24	411	268	101	369	780			Endocrine, nutritional and metabolic diseases	46	51	20	8	7	7	11	5	6	6	10
Diseases of nervous system	223	730	289	157	90	81	48	56	39	47	56	953	617	246	863	1816			Diseases of nervous system	217	638	257	141	82	71	43	47	33	39	51	855	551	213	764	1619			Diseases of nervous system	6	92	32	16	8	10	5	9	6	8	5
Meningitis¶ £	147	152	63	40	18	22	3	5	3	6	3	299	143	20	163	462			Meningitis¶ £	147	152	63	40	18	22	3	5	3	6	3	299	143	20	163	462			Meningitis¶ £	0	0	0	0	0	0	0	0	0	0	0
Cerebral palsy¶ £	2	89	25	21	11	15	10	9	11	6	7	91	72	43	115	206			Cerebral palsy¶ £	2	89	25	21	11	15	10	9	11	6	7	91	72	43	115	206			Cerebral palsy¶ £	0	0	0	0	0	0	0	0	0	0	0
Other causes of diseases of nervous disease¶ £	68	397	169	80	53	34	30	33	19	27	41	465	336	150	486	951			Other causes of diseases of nervous disease¶ £	68	397	169	80	53	34	30	33	19	27	41	465	336	150	486	951			Other causes of diseases of nervous disease¶ £	0	0	0	0	0	0	0	0	0	0	0
Diseases of circulatory system	49	162	62	30	23	20	12	18	12	15	17	211	135	74	209	420			Diseases of circulatory system	38	129	52	21	17	14	8	13	9	13	13	167	104	56	160	327			Diseases of circulatory system	11	33	10	9	6	6	4	5	3	2	4
Diseases of respiratory system	153	658	201	95	42	28	25	26	13	12	12	811	366	88	454	1265			Diseases of respiratory system	143	606	181	86	36	24	25	20	12	10	8	749	327	75	402	1151			Diseases of respiratory system	10	52	20	9	6	4	0	6	1	2	4
Pneumonia¶ £	119	381	80	31	7	11	11	8	2	5	0	500	129	26	155	655			Pneumonia¶ £	119	381	80	31	7	11	11	8	2	5	0	500	129	26	155	655			Pneumonia¶ £	0	0	0	0	0	0	0	0	0	0	0
Diseases of the digestive system	135	109	40	17	15	20	4	9	4	5	6	244	92	28	120	364			Diseases of the digestive system	131	101	38	15	12	19	4	8	3	5	5	232	84	25	109	341			Diseases of the digestive system	4	8	2	2	3	1	0	1	1	0	1
Certain conditions originating in the perinatal period¶	12880	702	39	13	15	11	6	5	5	3	4	13582	78	23	101	13683			Certain conditions originating in the perinatal period¶	12880	702	39	13	15	11	6	5	5	3	4	13582	78	23	101	13683			Certain conditions originating in the perinatal period¶	0	0	0	0	0	0	0	0	0	0	0
Congenital malformations	8766	3871	781	357	216	144	107	98	77	56	56	12637	1498	394	1892	14529			Congenital malformations	7529	3408	697	313	180	119	85	84	60	51	49	10937	1309	329	1638	12575			Congenital malformations	1237	463	84	44	36	25	22	14	17	5	7
Sudden infant death syndrome¶	148	1179	7	0	0	0	0	0	0	0	0	1327	7	0	7	1334			Sudden infant death syndrome¶	148	1179	7	0	0	0	0	0	0	0	0	1327	7	0	7	1334			Sudden infant death syndrome¶	0	0	0	0	0	0	0	0	0	0	0
Unknown or unspecified causes	239	2262	106	29	12	16	15	8	7	6	5	2501	163	41	204	2705			Unknown or unspecified causes	230	2249	101	28	10	13	14	8	7	5	4	2479	152	38	190	2669			Unknown or unspecified causes	9	13	5	1	2	3	1	0	0	1	1
Other diseases	2086	800	165	83	79	47	56	49	53	58	48	2886	374	264	638	3524			Other diseases	147	243	130	73	73	46	52	47	46	55	48	390	322	248	570	960			Other diseases	1939	557	35	10	6	1	4	2	7	3	0
Unnatural death from external causes of injury and poisoning												0	0	0	0	0			Unnatural death from external causes of injury and poisoning												0	0	0	0	0			Unnatural death from external causes of injury and poisoning
Transport accidents	14	119	162	122	145	141	130	138	138	138	136	133	570	680	1250	1383			Transport accidents	11	100	134	99	128	129	112	121	117	116	116	111	490	582	1072	1183			Transport accidents	3	19	28	23	17	12	18	17	21	22	20
Drowning	2	20	117	116	94	80	66	53	65	35	16	22	407	235	642	664			Drowning	2	16	94	89	71	60	53	36	49	31	15	18	314	184	498	516			Drowning	0	4	23	27	23	20	13	17	16	4	1
Other external causes	75	394	299	204	204	156	138	108	87	84	74	469	863	491	1354	1823			Other external causes	45	335	267	170	178	136	114	91	72	67	64	380	751	408	1159	1539			Other external causes	30	59	32	34	26	20	24	17	15	17	10
¶: ICD codes only avaiable in Denmark and Sweden																			¶: ICD codes only avaiable in Denmark and Sweden																			¶: ICD codes only avaiable in Denmark and Sweden
£: subgroup within main groups																			£: subgroup within main groups																			£: subgroup within main groups
[truncated: 5 more columns]

## Sheet: S1b Table All-cause
All	Table1 Total mortality rates per 100,000 person years over age and calendar Year										Boys	Table2 Total mortality rates per 100,000 person years over age and calendar period in boys										Girls	Table3 Total mortality rates per 100,000 person years over age and calendar period in girls
	Age	1973-1980	1981-1985	1986-1990	1991-1995	1996-2000	2001-2005	2006-2010	d%*			Age	1973-1980	1981-1985	1986-1990	1991-1995	1996-2000	2001-2005	2006-2010	d%*			Age	1973-1980	1981-1985	1986-1990	1991-1995	1996-2000	2001-2005	2006-2010	d%*
	0-27 days											0-27 days											0-27 days
	IR(95%CI)	8167.0(7994.2-8343.5)	5382.6(5196.6-5575.3)	4843.7(4699.0-4993.0)	4204.4(4077.1-4335.7)	3561.4(3435.4-3692.1)	2841.1(2729.4-2957.5)	1185.7(1073.4-1309.8)	0.472164			IR(95%CI)	9423.3(9165.0-9688.9)	5901.0(5630.7-6184.3)	5401.0(5188.7-5622.0)	4661.0(4474.6-4855.1)	4006.8(3821.2-4201.5)	3085.1(2923.6-3255.6)	1250.5(1092.3-1431.6)	0.477194			IR(95%CI)	6843.6(6618.3-7076.6)	4836.5(4586.0-5100.5)	4255.7(4062.6-4457.9)	3724.8(3554.5-3903.2)	3092.8(2926.1-3268.9)	2584.4(2433.2-2745.0)	1117.4(964.7-1294.2)	0.465643
	Cases/PY	8400/102,853	3106/57,704	4171/86,111	4062/96,613	2959/83,084	2385/83,945	388/32,723				Cases/PY	4972/52,763	1747/29,605	2388/44,214	2307/49,496	1707/42,603	1328/43,046	210/16,793				Cases/PY	3428/50,090	1359/28,099	1783/41,897	1755/47,117	1252/40,482	1057/40,899	178/15,930
	28-345 days											28-345 days											28-345 days
	IR(95%CI)	252.6(243.6-261.9)	273.1(261.1-285.7)	254.7(244.9-264.8)	181.8(174.2-189.7)	124.1(117.4-131.2)	104.0(97.9-110.5)	47.2(41.5-53.7)	0.619306			IR(95%CI)	277.8(264.7-291.5)	296.5(279.1-315.0)	281.4(267.2-296.4)	204.0(192.8-215.7)	134.1(124.5-144.4)	116.5(107.5-126.2)	54.7(46.3-64.6)	0.607127			IR(95%CI)	226.1(214.0-238.8)	248.5(232.2-265.9)	226.5(213.4-240.4)	158.6(148.6-169.2)	113.6(104.6-123.4)	90.8(82.7-99.6)	39.3(32.2-48.1)	0.634612
	Cases/PY	2940/1,163,932	1889/691,628	2517/988,237	2126/1,169,412	1251/1,008,036	1044/1,004,074	234/495,667				Cases/PY	1658/596,863	1052/354,789	1428/507,456	1221/598,623	693/516,896	600/515,055	139/254,203				Cases/PY	1282/567,070	837/336,839	1089/480,782	905/570,789	558/491,140	444/489,019	95/241,464
	1y-											1y-											1y-
	IR(95%CI)	66.5(61.9-71.5)	50.3(45.5-55.6)	52.0(47.7-56.8)	36.2(33.0-39.7)	34.0(30.7-37.6)	30.8(27.6-34.3)	15.4(12.7-18.5)	0.388603			IR(95%CI)	72.3(65.6-79.6)	50.9(44.2-58.5)	51.7(45.7-58.4)	38.9(34.4-44.1)	35.6(31.0-40.8)	32.0(27.6-37.1)	15.8(12.2-20.4)	0.371313			IR(95%CI)	60.5(54.2-67.4)	49.7(43.0-57.5)	52.4(46.3-59.4)	33.3(29.0-38.2)	32.3(27.8-37.4)	29.5(25.2-34.5)	14.9(11.4-19.6)	0.407239
	Cases/PY	734/1,103,580	378/751,525	506/972,491	459/1,268,361	380/1,118,944	330/1,073,106	110/715,691				Cases/PY	409/565,964	196/385,341	258/499,442	253/649,631	204/573,449	176/550,386	58/366,927				Cases/PY	325/537,616	182/366,184	248/473,050	206/618,730	176/545,496	154/522,721	52/348,765
	2y-											2y-											2y-
	IR(95%CI)	40.2(36.3-44.5)	29.7(26.1-33.9)	32.0(28.5-36.0)	22.9(20.4-25.7)	18.6(16.3-21.3)	19.6(17.1-22.5)	10.3(8.3-12.7)	0.339929			IR(95%CI)	45.5(39.9-51.9)	33.6(28.3-39.9)	36.2(31.1-42.2)	25.0(21.4-29.2)	19.6(16.4-23.6)	23.6(19.8-28.0)	10.0(7.4-13.6)	0.299677			IR(95%CI)	34.6(29.6-40.4)	25.7(21.0-31.4)	27.7(23.1-33.1)	20.8(17.4-24.7)	17.6(14.4-21.4)	15.5(12.5-19.3)	10.5(7.8-14.2)	0.395643
	Cases/PY	379/942,888	226/759,795	281/876,966	288/1,255,921	215/1,153,571	208/1,059,401	84/818,271				Cases/PY	220/483,553	131/389,520	163/450,214	161/644,139	116/590,511	128/543,463	42/419,243				Cases/PY	159/459,335	95/370,275	118/426,752	127/611,782	99/563,060	80/515,939	42/399,028
	3y-											3y-											3y-
	IR(95%CI)	35.8(31.9-40.3)	26.3(22.9-30.2)	23.9(20.8-27.6)	20.1(17.7-22.7)	14.1(12.1-16.4)	16.8(14.4-19.4)	10.3(8.3-12.7)	0.363306			IR(95%CI)	42.7(36.7-49.6)	30.8(25.7-36.8)	27.4(22.7-33.0)	22.4(19.0-26.4)	16.9(13.9-20.5)	17.6(14.4-21.6)	10.8(8.1-14.4)	0.426701			IR(95%CI)	28.6(23.7-34.5)	21.6(17.4-26.9)	20.3(16.3-25.4)	17.6(14.5-21.3)	11.2(8.8-14.2)	15.8(12.7-19.7)	9.8(7.2-13.4)	0.268672
	Cases/PY	280/781,788	202/767,820	189/789,495	246/1,225,646	168/1,192,088	176/1,050,728	86/834,530				Cases/PY	171/400,718	121/393,433	111/405,466	141/628,805	103/610,228	95/538,800	46/427,639				Cases/PY	109/381,070	81/374,387	78/384,028	105/596,840	65/581,860	81/511,928	40/406,891
	4y-											4y-											4y-
	IR(95%CI)	29.0(25.1-33.6)	23.6(20.4-27.3)	20.1(17.1-23.6)	17.5(15.2-20.1)	13.7(11.8-15.9)	13.3(11.3-15.7)	9.0(7.2-11.3)	0.436311			IR(95%CI)	31.4(25.8-38.2)	27.5(22.8-33.2)	20.4(16.3-25.4)	19.8(16.5-23.7)	16.9(14.0-20.4)	14.0(11.2-17.5)	9.3(6.8-12.7)	0.491672			IR(95%CI)	26.4(21.2-32.9)	19.5(15.5-24.5)	19.8(15.8-25.0)	15.0(12.2-18.6)	10.4(8.1-13.3)	12.6(9.9-16.0)	8.7(6.3-12.2)	0.354002
	Cases/PY	180/620,852	184/779,542	150/745,528	203/1,161,046	168/1,226,201	141/1,059,744	74/821,630				Cases/PY	100/318,073	110/399,728	78/382,714	118/595,592	106/628,018	76/543,303	39/420,849				Cases/PY	80/302,779	74/379,813	72/362,814	85/565,454	62/598,183	65/516,441	35/400,781
	5y-											5y-											5y-
	IR(95%CI)	28.8(24.3-34.3)	19.9(17.0-23.2)	17.8(15.0-21.1)	12.6(10.7-15.0)	12.8(11.0-14.9)	11.4(9.5-13.6)	9.1(7.3-11.5)	0.427511			IR(95%CI)	34.2(27.4-42.7)	22.1(17.9-27.1)	21.2(17.0-26.3)	12.8(10.2-16.2)	15.0(12.3-18.3)	13.4(10.7-16.9)	10.3(7.7-13.9)	0.390238			IR(95%CI)	23.2(17.6-30.5)	17.5(13.8-22.2)	14.2(10.8-18.7)	12.4(9.7-15.8)	10.5(8.2-13.4)	9.2(6.9-12.2)	7.8(5.5-11.2)	0.47678
	Cases/PY	130/450,662	158/795,685	131/737,412	134/1,061,312	160/1,250,384	122/1,073,190	74/810,772				Cases/PY	79/230,869	90/408,047	80/378,171	70/544,830	96/640,019	74/550,223	43/415,690				Cases/PY	51/219,793	68/387,638	51/359,241	64/516,482	64/610,365	48/522,967	31/395,082
	6y-											6y-											6y-
	IR(95%CI)	24.3(19.1-30.9)	19.7(16.9-23.0)	16.5(13.8-19.7)	15.6(13.3-18.3)	13.4(11.5-15.6)	10.5(8.8-12.6)	7.6(5.9-9.8)	0.466243			IR(95%CI)	30.1(22.3-40.8)	23.4(19.2-28.5)	17.4(13.7-22.1)	18.2(14.8-22.4)	16.2(13.4-19.6)	11.0(8.6-14.1)	6.3(4.3-9.3)	0.531129			IR(95%CI)	18.1(12.2-27.1)	15.8(12.4-20.3)	15.5(11.9-20.1)	12.8(10.0-16.5)	10.5(8.2-13.4)	10.0(7.7-13.1)	8.9(6.4-12.5)	0.365284
	Cases/PY	66/271,722	161/816,483	122/740,886	150/961,877	168/1,254,561	116/1,102,137	61/802,833				Cases/PY	42/139,354	98/418,600	66/379,744	90/493,821	104/642,517	62/564,823	26/411,682				Cases/PY	24/132,368	63/397,882	56/361,142	60/468,057	64/612,043	54/537,314	35/391,151
	7y-											7y-											7y-
	IR(95%CI)	17.3(10.6-28.3)	20.0(17.1-23.2)	13.2(10.9-16.1)	15.6(13.2-18.5)	10.7(9.0-12.7)	9.8(8.1-11.8)	8.7(6.8-11.0)	0.510264			IR(95%CI)	14.8(7.0-30.9)	24.9(20.6-30.1)	14.1(10.8-18.4)	20.3(16.5-24.9)	12.3(9.8-15.3)	10.1(7.9-13.1)	10.5(7.8-14.2)	0.593137			IR(95%CI)	20.0(10.4-38.5)	14.7(11.4-18.9)	12.3(9.2-16.5)	10.7(8.0-14.3)	9.1(7.0-11.8)	9.4(7.1-12.3)	6.7(4.6-9.8)	0.362395
	Cases/PY	16/92,389	167/836,764	99/748,405	135/865,857	133/1,241,664	111/1,135,657	69/797,367				Cases/PY	7/47,452	107/428,945	54/383,506	90/444,322	78/636,729	59/581,328	43/408,866				Cases/PY	9/44,937	60/407,819	45/364,899	45/421,535	55/604,935	52/554,329	26/388,501
	8y-											8y-											8y-
	IR(95%CI)		18.0(15.2-21.2)	15.4(12.8-18.5)	12.8(10.5-15.5)	9.8(8.2-11.7)	10.8(9.1-12.8)	8.3(6.5-10.5)	0.400456			IR(95%CI)		22.7(18.5-27.9)	19.0(15.1-23.9)	17.4(13.8-22.0)	11.4(9.0-14.3)	11.3(8.9-14.3)	9.3(6.8-12.8)	0.50362			IR(95%CI)		13.0(9.8-17.2)	11.6(8.6-15.6)	7.9(5.5-11.3)	8.1(6.1-10.7)	10.3(7.9-13.2)	7.2(5.0-10.4)	0.210873
	Cases/PY		139/773,342	117/759,844	100/782,709	119/1,217,165	127/1,178,527	66/797,576				Cases/PY		90/396,351	74/389,236	70/401,876	71/624,399	68/603,299	38/408,881				Cases/PY		49/376,991	43/370,608	30/380,833	48/592,766	59/575,228	28/388,695
	9y-											9y-											9y-
	IR(95%CI)		18.1(15.1-21.8)	15.7(13.2-18.8)	13.6(11.2-16.5)	11.5(9.7-13.6)	10.3(8.6-12.2)	7.8(6.1-10.0)	0.434264			IR(95%CI)		24.2(19.4-30.3)	19.0(15.2-23.9)	13.2(10.0-17.5)	14.6(11.8-18.0)	11.1(8.8-14.1)	8.5(6.1-11.8)	0.540247			IR(95%CI)		11.7(8.4-16.3)	12.3(9.2-16.4)	14.0(10.6-18.4)	8.2(6.2-11.0)	9.3(7.2-12.1)	7.1(4.9-10.3)	0.204139
	Cases/PY		111/612,234	121/768,540	100/735,772	132/1,148,569	124/1,208,932	63/805,964				Cases/PY		76/313,574	75/394,033	50/377,642	86/589,028	69/619,228	35/412,967				Cases/PY		35/298,660	46/374,507	50/358,130	46/559,541	55/589,705	28/392,997
	<1y											<1y											<1y
	IR(95%CI)	895.2(878.9-911.8)	666.6(648.4-685.3)	622.5(607.8-637.6)	488.8(476.7-501.1)	385.8(374.4-397.7)	315.2(304.8-325.9)	117.7(108.8-127.3)	0.527153			IR(95%CI)	1020.6(996.3-1045.5)	728.2(701.7-755.6)	691.7(670.1-714.0)	544.3(526.7-562.6)	429.0(412.1-446.5)	345.5(330.4-361.2)	128.8(116.0-143.0)	0.525574			IR(95%CI)	763.2(741.7-785.3)	601.7(577.1-627.4)	549.5(529.7-569.9)	430.5(414.4-447.2)	340.5(325.1-356.5)	283.3(269.3-297.9)	106.1(94.2-119.4)	0.529284
	Cases/PY	11340/1,266,785	4995/749,332	6688/1,074,348	6188/1,266,025	4210/1,091,121	3429/1,088,019	622/528,390				Cases/PY	6630/649,625	2799/384,394	3816/551,670	3528/648,119	2400/559,499	1928/558,101	349/270,996				Cases/PY	4710/617,160	2196/364,938	2872/522,679	2660/617,906	1810/531,622	1501/529,918	273/257,394
	1-4y											1-4y											1-4y
	IR(95%CI)	45.6(43.4-47.9)	32.4(30.4-34.4)	33.3(31.4-35.3)	24.4(23.0-25.8)	19.8(18.6-21.2)	20.2(18.8-21.5)	11.1(10.0-12.3)	0.377421			IR(95%CI)	50.9(47.7-54.3)	35.6(32.8-38.7)	35.1(32.4-38.0)	26.7(24.8-28.8)	22.0(20.2-24.0)	21.8(20.0-23.9)	11.3(9.8-13.1)	0.386574			IR(95%CI)	40.0(37.1-43.2)	29.0(26.4-31.8)	31.3(28.7-34.2)	21.9(20.1-23.8)	17.6(15.9-19.4)	18.4(16.6-20.3)	10.9(9.3-12.6)	0.365645
	Cases/PY	1573/3,449,109	990/3,058,682	1126/3,384,480	1196/4,910,974	931/4,690,805	855/4,242,980	354/3,190,121				Cases/PY	900/1,768,308	558/1,568,022	610/1,737,836	673/2,518,167	529/2,402,206	475/2,175,951	185/1,634,657				Cases/PY	673/1,680,801	432/1,490,661	516/1,646,644	523/2,392,807	402/2,288,599	380/2,067,028	169/1,555,464
	5-9y											5-9y											5-9y
	IR(95%CI)	26.0(22.7-29.8)	19.2(17.9-20.6)	15.7(14.5-17.0)	14.0(13.0-15.2)	11.6(10.8-12.5)	10.5(9.7-11.4)	8.3(7.5-9.2)	0.451437			IR(95%CI)	30.6(25.8-36.4)	23.5(21.4-25.7)	18.1(16.3-20.1)	16.4(14.8-18.1)	13.9(12.6-15.3)	11.4(10.2-12.7)	9.0(7.8-10.4)	0.515053			IR(95%CI)	21.2(17.1-26.2)	14.7(13.1-16.6)	13.2(11.6-14.9)	11.6(10.3-13.1)	9.3(8.3-10.5)	9.6(8.6-10.9)	7.6(6.4-8.9)	0.344707
	Cases/PY	212/814,773	736/3,834,508	590/3,755,087	619/4,407,527	712/6,112,342	600/5,698,443	333/4,014,512				Cases/PY	128/417,674	461/1,965,517	349/1,924,689	370/2,262,491	435/3,132,693	332/2,918,901	185/2,058,087				Cases/PY	84/397,099	275/1,868,990	241/1,830,398	249/2,145,036	277/2,979,650	268/2,779,543	148/1,956,425
	*d%=(rate1981-1985-rate2001-2005)/rate1981-1985											*d%=(rate1981-1985-rate2001-2005)/rate1981-1985											*d%=(rate1981-1985-rate2001-2005)/rate1981-1985
