# Supplementary material for: Mortality in Children Aged 0-9 Years: A Nationwide Cohort Study from Three Nordic Countries
Source: PLoS One. 2016 Jan 8;11(1):e0146669. doi: 10.1371/journal.pone.0146669 (PMC4706349; doi:10.1371/journal.pone.0146669)
Supplement: S2 Table — (XLSX) [file pone.0146669.s002.xlsx]

## Sheet: S2 Table natural
All	Table1 Mortality rates of natural death over age and calendar period											Boys	Table2 Mortality rates of natural death over age and calendar period in boys											Girls	Table3 Mortality rates of natural death over age and calendar period in girls
	Age	1973-1980	1981-1985	1986-1990	1991-1995	1996-2000	2001-2005	2006-2010	d%*				Age	1973-1980	1981-1985	1986-1990	1991-1995	1996-2000	2001-2005	2006-2010	d%*				Age	1973-1980	1981-1985	1986-1990	1991-1995	1996-2000	2001-2005	2006-2010	d%*
	0-27 days												0-27 days												0-27 days
	IR(95%CI)	8148.5(7975.9-8324.9)	5367.0(5181.3-5559.4)	4820.5(4676.1-4969.4)	4158.9(4032.2-4289.5)	3491.6(3366.9-3621.0)	2811.4(2700.2-2927.1)	1170.4(1058.9-1293.7)	0.476179				IR(95%CI)	9411.9(9153.8-9677.4)	5877.4(5607.6-6160.1)	5376.1(5164.3-5596.7)	4604.4(4419.2-4797.4)	3922.3(3738.7-4114.9)	3043.3(2882.9-3212.6)	1244.6(1086.8-1425.3)	0.482205				IR(95%CI)	6817.7(6592.8-7050.2)	4829.3(4579.1-5093.2)	4234.2(4041.7-4435.9)	3690.8(3521.3-3868.4)	3038.4(2873.3-3213.0)	2567.3(2416.6-2727.4)	1092.3(941.5-1267.3)	0.468399
	Cases/PY	8381/102,853	3097/57,704	4151/86,111	4018/96,613	2901/83,084	2360/83,945	383/32,723					Cases/PY	4966/52,763	1740/29,605	2377/44,214	2279/49,496	1671/42,603	1310/43,046	209/16,793					Cases/PY	3415/50,090	1357/28,099	1774/41,897	1739/47,117	1230/40,482	1050/40,899	174/15,930
	28-345 days												28-345 days												28-345 days
	IR(95%CI)	236.8(228.1-245.8)	261.7(249.9-274.0)	244.0(234.4-253.9)	173.6(166.2-181.3)	117.7(111.1-124.5)	98.6(92.6-104.9)	39.7(34.6-45.7)	0.623241				IR(95%CI)	260.2(247.6-273.5)	284.7(267.7-302.8)	271.4(257.4-286.1)	194.9(184.1-206.5)	127.1(117.7-137.2)	110.3(101.6-119.7)	46.4(38.8-55.6)	0.612614				IR(95%CI)	212.1(200.5-224.5)	237.5(221.6-254.5)	215.1(202.3-228.6)	151.2(141.4-161.6)	107.7(98.9-117.3)	86.3(78.4-94.9)	32.7(26.2-40.8)	0.636655
	Cases/PY	2756/1,163,932	1810/691,628	2411/988,237	2030/1,169,412	1186/1,008,036	990/1,004,074	197/495,667					Cases/PY	1553/596,863	1010/354,789	1377/507,456	1167/598,623	657/516,896	568/515,055	118/254,203					Cases/PY	1203/567,070	800/336,839	1034/480,782	863/570,789	529/491,140	422/489,019	79/241,464
	1y-												1y-												1y-
	IR(95%CI)	52.6(48.5-57.1)	40.3(36.0-45.1)	41.0(37.2-45.3)	28.1(25.4-31.2)	26.7(23.9-29.9)	23.6(20.8-26.7)	8.1(6.3-10.5)	0.415239				IR(95%CI)	55.5(49.7-62.0)	42.6(36.5-49.6)	41.4(36.2-47.5)	29.2(25.4-33.7)	26.9(22.9-31.4)	23.8(20.1-28.2)	8.4(5.9-12.0)	0.440751				IR(95%CI)	49.7(44.1-56.0)	38.0(32.1-44.8)	40.6(35.2-46.8)	27.0(23.2-31.4)	26.6(22.6-31.3)	23.3(19.5-27.9)	7.7(5.3-11.3)	0.385142
	Cases/PY	581/1,103,580	303/751,525	399/972,491	357/1,268,361	299/1,118,944	253/1,073,106	58/715,691					Cases/PY	314/565,964	164/385,341	207/499,442	190/649,631	154/573,449	131/550,386	31/366,927					Cases/PY	267/537,616	139/366,184	192/473,050	167/618,730	145/545,496	122/522,721	27/348,765
	2y-												2y-												2y-
	IR(95%CI)	28.7(25.5-32.4)	22.1(19.0-25.7)	21.7(18.8-25.0)	16.4(14.3-18.8)	13.4(11.5-15.7)	15.6(13.4-18.1)	5.3(3.9-7.1)	0.295614				IR(95%CI)	31.4(26.8-36.9)	24.9(20.4-30.4)	24.9(20.7-29.9)	17.5(14.6-21.1)	14.4(11.6-17.8)	18.4(15.1-22.4)	4.8(3.1-7.4)	0.261096				IR(95%CI)	25.9(21.6-31.0)	19.2(15.2-24.2)	18.3(14.6-22.8)	15.2(12.4-18.6)	12.4(9.8-15.7)	12.6(9.9-16.1)	5.8(3.8-8.7)	0.342975
	Cases/PY	271/942,888	168/759,795	190/876,966	206/1,255,921	155/1,153,571	165/1,059,401	43/818,271					Cases/PY	152/483,553	97/389,520	112/450,214	113/644,139	85/590,511	100/543,463	20/419,243					Cases/PY	119/459,335	71/370,275	78/426,752	93/611,782	70/563,060	65/515,939	23/399,028
	3y-												3y-												3y-
	IR(95%CI)	21.6(18.6-25.1)	15.9(13.3-19.0)	16.0(13.4-19.0)	12.9(11.0-15.1)	10.1(8.4-12.0)	10.8(8.9-12.9)	6.7(5.2-8.7)	0.323157				IR(95%CI)	24.2(19.8-29.5)	18.0(14.3-22.8)	17.8(14.1-22.4)	13.8(11.2-17.1)	11.5(9.1-14.5)	11.0(8.5-14.1)	7.5(5.3-10.6)	0.393213				IR(95%CI)	18.9(15.0-23.8)	13.6(10.4-17.9)	14.1(10.8-18.4)	11.9(9.4-15.0)	8.6(6.5-11.3)	10.5(8.1-13.8)	5.9(4.0-8.8)	0.225652
	Cases/PY	169/781,788	122/767,820	126/789,495	158/1,225,646	120/1,192,088	113/1,050,728	56/834,530					Cases/PY	97/400,718	71/393,433	72/405,466	87/628,805	70/610,228	59/538,800	32/427,639					Cases/PY	72/381,070	51/374,387	54/384,028	71/596,840	50/581,860	54/511,928	24/406,891
	4y-												4y-												4y-
	IR(95%CI)	18.4(15.3-22.1)	13.0(10.7-15.7)	12.9(10.5-15.7)	12.0(10.1-14.1)	9.3(7.7-11.2)	9.1(7.4-11.1)	4.7(3.5-6.5)	0.300821				IR(95%CI)	17.6(13.5-22.9)	14.5(11.2-18.8)	12.5(9.5-16.6)	13.4(10.8-16.7)	10.7(8.4-13.6)	9.6(7.3-12.6)	4.5(2.9-7.1)	0.340373				IR(95%CI)	19.2(14.8-24.8)	11.3(8.4-15.3)	13.2(10.0-17.6)	10.4(8.1-13.5)	7.9(5.9-10.5)	8.5(6.3-11.4)	5.0(3.2-7.7)	0.247453
	Cases/PY	114/620,852	101/779,542	96/745,528	139/1,161,046	114/1,226,201	96/1,059,744	39/821,630					Cases/PY	56/318,073	58/399,728	48/382,714	80/595,592	67/628,018	52/543,303	19/420,849					Cases/PY	58/302,779	43/379,813	48/362,814	59/565,454	47/598,183	44/516,441	20/400,781
	5y-												5y-												5y-
	IR(95%CI)	15.3(12.1-19.4)	11.7(9.5-14.3)	10.3(8.2-12.9)	7.8(6.3-9.7)	8.6(7.1-10.3)	7.2(5.7-9.0)	4.8(3.5-6.6)	0.386136				IR(95%CI)	17.8(13.1-24.1)	13.2(10.1-17.3)	12.4(9.3-16.5)	8.1(6.0-10.9)	9.4(7.3-12.1)	7.8(5.8-10.5)	6.0(4.1-8.9)	0.409464				IR(95%CI)	12.7(8.8-18.5)	10.1(7.4-13.8)	8.1(5.6-11.6)	7.6(5.5-10.3)	7.7(5.8-10.2)	6.5(4.6-9.1)	3.5(2.1-6.0)	0.353801
	Cases/PY	69/450,662	93/795,685	76/737,412	83/1,061,312	107/1,250,384	77/1,073,190	39/810,772					Cases/PY	41/230,869	54/408,047	47/378,171	44/544,830	60/640,019	43/550,223	25/415,690					Cases/PY	28/219,793	39/387,638	29/359,241	39/516,482	47/610,365	34/522,967	14/395,082
	6y-												6y-												6y-
	IR(95%CI)	14.4(10.5-19.6)	12.0(9.8-14.6)	9.3(7.4-11.8)	9.3(7.5-11.4)	8.7(7.2-10.5)	7.7(6.2-9.5)	3.7(2.6-5.3)	0.357454				IR(95%CI)	15.1(9.8-23.1)	14.6(11.3-18.7)	9.5(6.8-13.1)	9.7(7.3-12.9)	10.1(7.9-12.9)	7.6(5.6-10.3)	3.2(1.8-5.4)	0.477572				IR(95%CI)	13.6(8.6-21.6)	9.3(6.7-12.8)	9.1(6.5-12.9)	8.8(6.4-11.9)	7.2(5.3-9.7)	7.8(5.8-10.6)	4.3(2.7-7.0)	0.15943
	Cases/PY	39/271,722	98/816,483	69/740,886	89/961,877	109/1,254,561	85/1,102,137	30/802,833					Cases/PY	21/139,354	61/418,600	36/379,744	48/493,821	65/642,517	43/564,823	13/411,682					Cases/PY	18/132,368	37/397,882	33/361,142	41/468,057	44/612,043	42/537,314	17/391,151
	7y-												7y-												7y-
	IR(95%CI)	14.1(8.2-24.2)	10.3(8.3-12.7)	7.9(6.1-10.2)	8.0(6.3-10.1)	6.4(5.2-8.0)	6.1(4.8-7.7)	4.8(3.5-6.5)	0.408838				IR(95%CI)	12.6(5.7-28.1)	11.2(8.4-14.8)	7.8(5.5-11.2)	9.0(6.6-12.3)	6.6(4.9-8.9)	6.2(4.5-8.6)	5.6(3.7-8.5)	0.446597				IR(95%CI)	15.6(7.4-32.7)	9.3(6.8-12.8)	7.9(5.5-11.4)	6.9(4.8-9.9)	6.3(4.6-8.6)	6.0(4.2-8.4)	3.9(2.3-6.4)	0.361104
	Cases/PY	13/92,389	86/836,764	59/748,405	69/865,857	80/1,241,664	69/1,135,657	38/797,367					Cases/PY	6/47,452	48/428,945	30/383,506	40/444,322	42/636,729	36/581,328	23/408,866					Cases/PY	7/44,937	38/407,819	29/364,899	29/421,535	38/604,935	33/554,329	15/388,501
	8y-												8y-												8y-
	IR(95%CI)		11.4(9.2-14.0)	7.8(6.0-10.0)	7.5(5.8-9.7)	6.2(5.0-7.8)	6.0(4.8-7.6)	3.8(2.6-5.4)	0.470571				IR(95%CI)		14.9(11.5-19.2)	8.2(5.8-11.6)	10.2(7.5-13.9)	6.2(4.6-8.5)	5.6(4.0-7.9)	4.9(3.2-7.6)	0.621405				IR(95%CI)		7.7(5.3-11.1)	7.3(5.0-10.6)	4.7(3.0-7.5)	6.2(4.5-8.6)	6.4(4.7-8.9)	2.6(1.4-4.8)	0.16383
	Cases/PY		88/773,342	59/759,844	59/782,709	76/1,217,165	71/1,178,527	30/797,576					Cases/PY		59/396,351	32/389,236	41/401,876	39/624,399	34/603,299	20/408,881					Cases/PY		29/376,991	27/370,608	18/380,833	37/592,766	37/575,228	10/388,695
	9y-												9y-												9y-
	IR(95%CI)		10.1(7.9-13.0)	8.7(6.9-11.1)	9.2(7.3-11.7)	7.7(6.2-9.4)	6.6(5.3-8.2)	4.7(3.4-6.5)	0.346548				IR(95%CI)		13.4(9.9-18.1)	10.9(8.1-14.7)	9.5(6.9-13.2)	9.7(7.5-12.5)	7.4(5.6-9.9)	5.3(3.5-8.1)	0.445377				IR(95%CI)		6.7(4.3-10.4)	6.4(4.3-9.6)	8.9(6.3-12.6)	5.5(3.9-7.9)	5.8(4.1-8.1)	4.1(2.5-6.6)	0.139023
	Cases/PY		62/612,234	67/768,540	68/735,772	88/1,148,569	80/1,208,932	38/805,964					Cases/PY		42/313,574	43/394,033	36/377,642	57/589,028	46/619,228	22/412,967					Cases/PY		20/298,660	24/374,507	32/358,130	31/559,541	34/589,705	16/392,997
	<1y												<1y												<1y
	IR(95%CI)	879.2(863.0-895.6)	654.8(636.8-673.4)	610.8(596.2-625.7)	477.7(465.8-489.9)	374.6(363.3-386.2)	307.9(297.6-318.5)	109.8(101.2-119.1)	0.529817				IR(95%CI)	1003.5(979.4-1028.2)	715.4(689.2-742.7)	680.5(659.1-702.6)	531.7(514.2-549.7)	416.1(399.5-433.3)	336.5(321.6-352.1)	120.7(108.3-134.5)	0.529644				IR(95%CI)	748.3(727.0-770.2)	591.1(566.6-616.5)	537.2(517.7-557.5)	421.1(405.2-437.6)	330.9(315.8-346.7)	277.8(263.9-292.3)	98.3(86.9-111.2)	0.530032
	Cases/PY	11137/1,266,785	4907/749,332	6562/1,074,348	6048/1,266,025	4087/1,091,121	3350/1,088,019	580/528,390					Cases/PY	6519/649,625	2750/384,394	3754/551,670	3446/648,119	2328/559,499	1878/558,101	327/270,996					Cases/PY	4618/617,160	2157/364,938	2808/522,679	2602/617,906	1759/531,622	1472/529,918	253/257,394
	1-4y												1-4y												1-4y
	IR(95%CI)	32.9(31.0-34.9)	22.7(21.1-24.4)	24.0(22.4-25.7)	17.5(16.4-18.7)	14.7(13.6-15.8)	14.8(13.7-16.0)	6.1(5.3-7.1)	0.348714				IR(95%CI)	35.0(32.4-37.9)	24.9(22.5-27.5)	25.3(23.0-27.7)	18.7(17.1-20.4)	15.7(14.1-17.3)	15.7(14.1-17.5)	6.2(5.1-7.6)	0.368077				IR(95%CI)	30.7(28.2-33.5)	20.4(18.2-22.8)	22.6(20.4-25.0)	16.3(14.8-18.0)	13.6(12.2-15.2)	13.8(12.3-15.5)	6.0(4.9-7.4)	0.323911
	Cases/PY	1135/3,449,109	694/3,058,682	811/3,384,480	860/4,910,974	688/4,690,805	627/4,242,980	196/3,190,121					Cases/PY	619/1,768,308	390/1,568,022	439/1,737,836	470/2,518,167	376/2,402,206	342/2,175,951	102/1,634,657					Cases/PY	516/1,680,801	304/1,490,661	372/1,646,644	390/2,392,807	312/2,288,599	285/2,067,028	94/1,555,464
	5-9y												5-9y												5-9y
	IR(95%CI)	14.9(12.4-17.7)	11.1(10.1-12.2)	8.8(7.9-9.8)	8.3(7.5-9.2)	7.5(6.9-8.2)	6.7(6.1-7.4)	4.4(3.8-5.1)	0.398011				IR(95%CI)	16.3(12.8-20.6)	13.4(11.9-15.2)	9.8(8.5-11.3)	9.2(8.1-10.6)	8.4(7.4-9.5)	6.9(6.0-7.9)	5.0(4.1-6.1)	0.484765				IR(95%CI)	13.3(10.2-17.5)	8.7(7.5-10.2)	7.8(6.6-9.1)	7.4(6.3-8.7)	6.6(5.7-7.6)	6.5(5.6-7.5)	3.7(2.9-4.6)	0.257462
	Cases/PY	121/814,773	427/3,834,508	330/3,755,087	368/4,407,527	460/6,112,342	382/5,698,443	175/4,014,512					Cases/PY	68/417,674	264/1,965,517	188/1,924,689	209/2,262,491	263/3,132,693	202/2,918,901	103/2,058,087					Cases/PY	53/397,099	163/1,868,990	142/1,830,398	159/2,145,036	197/2,979,650	180/2,779,543	72/1,956,425
	*d%=(rate1981-1985-rate2001-2005)/rate1981-1985												*d%=(rate1981-1985-rate2001-2005)/rate1981-1985												*d%=(rate1981-1985-rate2001-2005)/rate1981-1985
