# Supplementary material for: Mortality in Children Aged 0-9 Years: A Nationwide Cohort Study from Three Nordic Countries
Source: PLoS One. 2016 Jan 8;11(1):e0146669. doi: 10.1371/journal.pone.0146669 (PMC4706349; doi:10.1371/journal.pone.0146669)
Supplement: S3 Table — (XLSX) [file pone.0146669.s003.xlsx]

## Sheet: S3 Table Unnatural
All	Table1 Mortality rates of unnatural death over age and calendar period										Boys	Table2 Mortality rates of unnatural death over age and calendar period in boys										Girls	Table3 Mortality rates of unnatural death over age and calendar period in girls
	Age group	1973-1980	1981-1985	1986-1990	1991-1995	1996-2000	2001-2005	2006-2010	d%*			Age group	1973-1980	1981-1985	1986-1990	1991-1995	1996-2000	2001-2005	2006-2010	d%*			Age group	1973-1980	1981-1985	1986-1990	1991-1995	1996-2000	2001-2005	2006-2010	d%*
	0-27 Days											0-27 Days											0-27 Days
	IR(95%CI)	18.5(11.8-29.0)	15.6(8.1-30.0)	22.1(14.1-34.6)	18.6(11.7-29.6)	14.4(8.2-25.4)	10.7(5.6-20.6)	15.3(6.4-36.7)	0.312597			IR(95%CI)	11.4(5.1-25.3)	23.6(11.3-49.6)	22.6(12.2-42.0)	26.3(15.3-45.2)	14.1(6.3-31.3)	11.6(4.8-27.9)	6.0(0.8-42.3)	0.508744			IR(95%CI)	26.0(15.1-44.7)	7.1(1.8-28.5)	21.5(11.2-41.3)	10.6(4.4-25.5)	14.8(6.7-33.0)	9.8(3.7-26.1)	25.1(9.4-66.9)	-0.374061
	Cases/PY	19/102,853	9/57,704	19/86,111	18/96,613	12/83,084	9/83,945	5/32,723				Cases/PY	6/52,763	7/29,605	10/44,214	13/49,496	6/42,603	5/43,046	1/16,793				Cases/PY	13/50,090	2/28,099	9/41,897	5/47,117	6/40,482	4/40,899	4/15,930
	28 Days-											28 Days-											28 Days-
	IR(95%CI)	15.1(13.0-17.5)	10.7(8.5-13.4)	8.9(7.2-11.0)	7.2(5.8-8.9)	5.6(4.3-7.2)	4.9(3.7-6.5)	1.2(0.5-2.7)	0.543888			IR(95%CI)	16.9(13.9-20.6)	11.3(8.3-15.4)	8.9(6.6-11.9)	7.7(5.8-10.3)	6.0(4.2-8.5)	5.6(3.9-8.1)	2.0(0.8-4.7)	0.500593			IR(95%CI)	13.2(10.5-16.6)	10.1(7.2-14.1)	8.9(6.6-12.1)	6.7(4.8-9.1)	5.1(3.4-7.5)	4.1(2.6-6.3)	0.4(0.1-2.9)	0.59482
	Cases/PY	176/1,163,932	74/691,628	88/988,237	84/1,169,412	56/1,008,036	49/1,004,074	6/495,667				Cases/PY	101/596,863	40/354,789	45/507,456	46/598,623	31/516,896	29/515,055	5/254,203				Cases/PY	75/567,070	34/336,839	43/480,782	38/570,789	25/491,140	20/489,019	1/241,464
	1y-											1y-											1y-
	IR(95%CI)	13.7(11.7-16.0)	8.9(7.0-11.3)	10.1(8.3-12.3)	8.0(6.6-9.7)	6.5(5.2-8.2)	6.9(5.5-8.7)	2.0(1.2-3.3)	0.226505			IR(95%CI)	16.6(13.6-20.3)	7.5(5.2-10.8)	9.2(6.9-12.3)	9.7(7.6-12.4)	8.0(6.0-10.7)	8.0(5.9-10.7)	3.0(1.7-5.4)	-0.0622648			IR(95%CI)	10.6(8.2-13.7)	10.4(7.6-14.3)	11.0(8.4-14.4)	6.1(4.5-8.4)	4.9(3.4-7.2)	5.7(4.0-8.2)	0.9(0.3-2.7)	0.446946
	Cases/PY	151/1,103,580	67/751,525	98/972,491	101/1,268,361	73/1,118,944	74/1,073,106	14/715,691				Cases/PY	94/565,964	29/385,341	46/499,442	63/649,631	46/573,449	44/550,386	11/366,927				Cases/PY	57/537,616	38/366,184	52/473,050	38/618,730	27/545,496	30/522,721	3/348,765
	2y-											2y-											2y-
	IR(95%CI)	11.2(9.3-13.6)	7.2(5.6-9.4)	10.0(8.1-12.4)	6.3(5.0-7.8)	5.1(4.0-6.6)	4.1(3.0-5.5)	1.6(0.9-2.7)	0.439286			IR(95%CI)	13.9(10.9-17.6)	8.2(5.8-11.6)	10.9(8.2-14.4)	7.1(5.3-9.5)	5.1(3.6-7.3)	5.2(3.6-7.5)	1.7(0.8-3.5)	0.372855			IR(95%CI)	8.5(6.2-11.6)	6.2(4.1-9.3)	9.1(6.7-12.5)	5.4(3.8-7.6)	5.2(3.6-7.4)	2.9(1.8-4.8)	1.5(0.7-3.3)	0.531952
	Cases/PY	106/942,888	55/759,795	88/876,966	79/1,255,921	59/1,153,571	43/1,059,401	13/818,271				Cases/PY	67/483,553	32/389,520	49/450,214	46/644,139	30/590,511	28/543,463	7/419,243				Cases/PY	39/459,335	23/370,275	39/426,752	33/611,782	29/563,060	15/515,939	6/399,028
	3y-											3y-											3y-
	IR(95%CI)	13.8(11.4-16.7)	9.9(7.9-12.4)	7.3(5.7-9.5)	6.9(5.5-8.5)	3.7(2.7-5.0)	5.8(4.5-7.5)	1.7(1.0-2.8)	0.413477			IR(95%CI)	18.0(14.3-22.6)	11.9(9.0-15.9)	8.9(6.4-12.3)	8.3(6.3-10.9)	5.1(3.6-7.2)	6.7(4.8-9.3)	2.1(1.1-4.0)	0.440697			IR(95%CI)	9.4(6.8-13.1)	7.7(5.4-11.1)	5.7(3.8-8.7)	5.4(3.8-7.6)	2.2(1.3-3.8)	4.9(3.3-7.2)	1.2(0.5-3.0)	0.369544
	Cases/PY	108/781,788	76/767,820	58/789,495	84/1,225,646	44/1,192,088	61/1,050,728	14/834,530				Cases/PY	72/400,718	47/393,433	36/405,466	52/628,805	31/610,228	36/538,800	9/427,639				Cases/PY	36/381,070	29/374,387	22/384,028	32/596,840	13/581,860	25/511,928	5/406,891
	4y-											4y-											4y-
	IR(95%CI)	10.5(8.2-13.4)	10.5(8.5-13.1)	7.1(5.4-9.3)	5.3(4.2-6.8)	4.2(3.2-5.5)	4.2(3.2-5.7)	2.1(1.3-3.3)	0.59632			IR(95%CI)	13.5(10.0-18.2)	12.8(9.7-16.8)	7.6(5.3-10.9)	6.2(4.5-8.6)	5.9(4.3-8.1)	4.4(3.0-6.6)	2.4(1.3-4.4)	0.65377			IR(95%CI)	7.3(4.8-11.0)	8.2(5.7-11.6)	6.6(4.4-9.9)	4.4(3.0-6.5)	2.3(1.4-4.0)	4.1(2.7-6.2)	1.7(0.8-3.7)	0.501796
	Cases/PY	65/620,852	82/779,542	53/745,528	62/1,161,046	51/1,226,201	45/1,059,744	17/821,630				Cases/PY	43/318,073	51/399,728	29/382,714	37/595,592	37/628,018	24/543,303	10/420,849				Cases/PY	22/302,779	31/379,813	24/362,814	25/565,454	14/598,183	21/516,441	7/400,781
	5y-											5y-											5y-
	IR(95%CI)	13.1(10.1-16.9)	8.2(6.4-10.4)	7.1(5.4-9.3)	4.5(3.4-6.0)	4.2(3.2-5.5)	4.2(3.1-5.6)	1.5(0.8-2.6)	0.486709			IR(95%CI)	15.6(11.2-21.6)	8.8(6.4-12.2)	8.5(6.0-12.0)	4.8(3.2-7.0)	5.6(4.1-7.8)	5.6(4.0-8.0)	1.7(0.8-3.5)	0.361397			IR(95%CI)	10.5(7.0-15.7)	7.5(5.2-10.8)	5.6(3.6-8.6)	4.3(2.8-6.5)	2.8(1.7-4.5)	2.7(1.6-4.5)	1.3(0.5-3.0)	0.642166
	Cases/PY	59/450,662	65/795,685	52/737,412	48/1,061,312	53/1,250,384	45/1,073,190	12/810,772				Cases/PY	36/230,869	36/408,047	32/378,171	26/544,830	36/640,019	31/550,223	7/415,690				Cases/PY	23/219,793	29/387,638	20/359,241	22/516,482	17/610,365	14/522,967	5/395,082
	6y-											6y-											6y-
	IR(95%CI)	9.6(6.5-14.1)	7.7(6.0-9.9)	6.7(5.1-8.9)	6.0(4.7-7.8)	4.7(3.6-6.1)	2.8(2.0-4.0)	1.5(0.8-2.6)	0.635471			IR(95%CI)	14.4(9.3-22.2)	8.8(6.4-12.2)	7.9(5.5-11.3)	8.1(5.9-11.0)	6.1(4.4-8.3)	3.4(2.1-5.3)	1.5(0.7-3.2)	0.619426			IR(95%CI)	4.5(2.0-10.1)	6.5(4.4-9.6)	5.5(3.6-8.6)	3.8(2.4-6.1)	3.3(2.1-5.1)	2.2(1.3-3.9)	1.5(0.7-3.4)	0.65823
	Cases/PY	26/271,722	63/816,483	50/740,886	58/961,877	59/1,254,561	31/1,102,137	12/802,833				Cases/PY	20/139,354	37/418,600	30/379,744	40/493,821	39/642,517	19/564,823	6/411,682				Cases/PY	6/132,368	26/397,882	20/361,142	18/468,057	20/612,043	12/537,314	6/391,151
	7y-											7y-											7y-
	IR(95%CI)	3.2(1.0-10.1)	9.4(7.6-11.8)	5.2(3.8-7.1)	7.3(5.7-9.3)	4.0(3.1-5.3)	3.6(2.7-4.9)	1.9(1.1-3.1)	0.617605			IR(95%CI)	2.1(0.3-15.0)	13.5(10.5-17.5)	6.3(4.2-9.3)	11.0(8.3-14.6)	5.3(3.8-7.5)	3.8(2.5-5.7)	2.7(1.5-4.9)	0.720118			IR(95%CI)	4.5(1.1-17.8)	5.1(3.4-7.9)	4.1(2.5-6.8)	3.3(2.0-5.6)	2.6(1.6-4.3)	3.4(2.2-5.4)	1.0(0.4-2.7)	0.334368
	Cases/PY	3/92,389	79/836,764	39/748,405	63/865,857	50/1,241,664	41/1,135,657	15/797,367				Cases/PY	1/47,452	58/428,945	24/383,506	49/444,322	34/636,729	22/581,328	11/408,866				Cases/PY	2/44,937	21/407,819	15/364,899	14/421,535	16/604,935	19/554,329	4/388,501
	8y-											8y-											8y-
	IR(95%CI)		5.9(4.5-7.9)	7.2(5.6-9.4)	5.1(3.7-7.0)	3.5(2.6-4.8)	4.8(3.7-6.2)	2.1(1.3-3.4)	0.201155			IR(95%CI)		6.8(4.7-9.9)	10.5(7.8-14.3)	7.2(5.0-10.4)	5.1(3.6-7.2)	5.6(4.0-7.9)	2.0(1.0-3.9)	0.1727			IR(95%CI)		5.0(3.2-7.9)	3.8(2.2-6.4)	2.9(1.6-5.2)	1.9(1.0-3.4)	3.8(2.5-5.8)	2.3(1.2-4.5)	0.241143
	Cases/PY		46/773,342	55/759,844	40/782,709	43/1,217,165	56/1,178,527	17/797,576				Cases/PY		27/396,351	41/389,236	29/401,876	32/624,399	34/603,299	8/408,881				Cases/PY		19/376,991	14/370,608	11/380,833	11/592,766	22/575,228	9/388,695
	9y-											9y-											9y-
	IR(95%CI)		7.7(5.8-10.2)	6.6(5.0-8.7)	4.2(3.0-6.0)	3.6(2.6-4.8)	3.6(2.7-4.9)	1.5(0.8-2.6)	0.5259			IR(95%CI)		10.2(7.2-14.4)	7.6(5.3-10.9)	3.7(2.2-6.3)	4.8(3.3-6.9)	3.7(2.5-5.6)	1.5(0.7-3.2)	0.636029			IR(95%CI)		5.0(3.0-8.3)	5.6(3.7-8.6)	4.7(3.0-7.6)	2.3(1.3-4.0)	3.6(2.3-5.5)	1.5(0.7-3.4)	0.29096
	Cases/PY		47/612,234	51/768,540	31/735,772	41/1,148,569	44/1,208,932	12/805,964				Cases/PY		32/313,574	30/394,033	14/377,642	28/589,028	23/619,228	6/412,967				Cases/PY		15/298,660	21/374,507	17/358,130	13/559,541	21/589,705	6/392,997
	<1y											<1y											<1y
	IR(95%CI)	15.4(13.4-17.7)	11.1(8.9-13.7)	10.0(8.2-12.0)	8.1(6.6-9.8)	6.2(4.9-7.9)	5.3(4.1-6.9)	2.1(1.2-3.8)	0.518731			IR(95%CI)	16.5(13.6-19.9)	12.2(9.2-16.3)	10.0(7.7-13.0)	9.1(7.1-11.7)	6.6(4.8-9.1)	6.1(4.4-8.5)	2.2(1.0-4.9)	0.501752			IR(95%CI)	14.3(11.6-17.6)	9.9(7.1-13.7)	9.9(7.6-13.1)	7.0(5.2-9.4)	5.8(4.1-8.3)	4.5(3.0-6.8)	1.9(0.8-4.7)	0.540888
	Cases/PY	195/1,266,785	83/749,332	107/1,074,348	102/1,266,025	68/1,091,121	58/1,088,019	11/528,390				Cases/PY	107/649,625	47/384,394	55/551,670	59/648,119	37/559,499	34/558,101	6/270,996				Cases/PY	88/617,160	36/364,938	52/522,679	43/617,906	31/531,622	24/529,918	5/257,394
	1-4y											1-4y											1-4y
	IR(95%CI)	12.5(11.3-13.7)	9.2(8.1-10.3)	8.8(7.8-9.8)	6.6(6.0-7.4)	4.8(4.2-5.5)	5.3(4.6-6.0)	1.8(1.4-2.4)	0.42587			IR(95%CI)	15.6(13.9-17.6)	10.1(8.7-11.8)	9.2(7.9-10.7)	7.9(6.8-9.0)	6.0(5.1-7.1)	6.1(5.1-7.2)	2.3(1.6-3.1)	0.401754			IR(95%CI)	9.2(7.8-10.7)	8.1(6.8-9.7)	8.3(7.0-9.8)	5.3(4.5-6.4)	3.6(2.9-4.5)	4.4(3.6-5.4)	1.4(0.9-2.1)	0.457639
	Cases/PY	430/3,449,109	280/3,058,682	297/3,384,480	326/4,910,974	227/4,690,805	223/4,242,980	58/3,190,121				Cases/PY	276/1,768,308	159/1,568,022	160/1,737,836	198/2,518,167	144/2,402,206	132/2,175,951	37/1,634,657				Cases/PY	154/1,680,801	121/1,490,661	137/1,646,644	128/2,392,807	83/2,288,599	91/2,067,028	21/1,555,464
	5-9y											5-9y											5-9y
	IR(95%CI)	10.8(8.8-13.3)	7.8(7.0-8.8)	6.6(5.8-7.5)	5.4(4.8-6.2)	4.0(3.6-4.6)	3.8(3.3-4.3)	1.7(1.3-2.1)	0.513266			IR(95%CI)	13.6(10.5-17.7)	9.7(8.4-11.1)	8.2(7.0-9.5)	7.0(6.0-8.2)	5.4(4.6-6.3)	4.4(3.7-5.3)	1.8(1.3-2.5)	0.542813			IR(95%CI)	7.8(5.5-11.1)	5.9(4.9-7.1)	4.9(4.0-6.0)	3.8(3.1-4.7)	2.6(2.1-3.2)	3.2(2.6-3.9)	1.5(1.1-2.2)	0.462073
	Cases/PY	88/814,773	300/3,834,508	247/3,755,087	240/4,407,527	246/6,112,342	217/5,698,443	68/4,014,512				Cases/PY	57/417,674	190/1,965,517	157/1,924,689	158/2,262,491	169/3,132,693	129/2,918,901	38/2,058,087				Cases/PY	31/397,099	110/1,868,990	90/1,830,398	82/2,145,036	77/2,979,650	88/2,779,543	30/1,956,425
	*d%=(rate1981-1985-rate2001-2005)/rate1981-1985											*d%=(rate1981-1985-rate2001-2005)/rate1981-1985											*d%=(rate1981-1985-rate2001-2005)/rate1981-1985
