# Supplementary material for: Mortality in Children Aged 0-9 Years: A Nationwide Cohort Study from Three Nordic Countries
Source: PLoS One. 2016 Jan 8;11(1):e0146669. doi: 10.1371/journal.pone.0146669 (PMC4706349; doi:10.1371/journal.pone.0146669)
Supplement: S4 Table — (XLSX) [file pone.0146669.s004.xlsx]

## Sheet: S4 Table RR of boys to girls
Table7 Mortality rates ratio of boys to girls(RRm/f) in 1981-1985 and 2001-2005
		RRm/f
Causes of death	Age	1981-1985	2001-2005
All-causes
	<1y	1.21(1.09-1.35)	1.22(1.04-1.43)
	1-4y	1.23(0.75-2.01)	1.19(0.64-2.21)
	5-9y	1.59(0.83-3.06)	1.18(0.5-2.78)
Neoplasms
	<1y	1.25(0.72-2.18)	1.72(0.93-3.17)
	1-4y	1.31(0.94-1.84)	0.95(0.70-1.30)
	5-9y	1.71(1.29-2.27)	1.24(0.91-1.69)
Diseases of nervous system
	<1y	0.84(0.6-1.18)	1.35(0.9-2.03)
	1-4y	1.39(0.91-2.11)	1.19(0.77-1.86)
	5-9y	1.6(0.86-2.98)	0.59(0.33-1.06)
Transport accidents
	<1y	1.71(0.57-5.1)	2.61(0.83-8.2)
	1-4y	1.01(0.68-1.49)	0.82(0.49-1.39)
	5-9y	1.5(1.08-2.09)	1.75(1.08-2.85)
