# Supplementary material for: Mortality in Children Aged 0-9 Years: A Nationwide Cohort Study from Three Nordic Countries
Source: PLoS One. 2016 Jan 8;11(1):e0146669. doi: 10.1371/journal.pone.0146669 (PMC4706349; doi:10.1371/journal.pone.0146669)
Supplement: S5 Table — (XLSX) [file pone.0146669.s005.xlsx]

## Sheet: S5 Table neoplasms
All	Table1 Mortality rates of neoplasms over age and calendar period										Boys	Table2 Mortality rates of neoplasms over age and calendar period in boys											Table3 Mortality rates of neoplasms over age and calendar period in girls
	Age group	1973-1980	1981-1985	1986-1990	1991-1995	1996-2000	2001-2005	2006-2010	d%*			Age group	1973-1980	1981-1985	1986-1990	1991-1995	1996-2000	2001-2005	2006-2010	d%*		female	Age group	1973-1980	1981-1985	1986-1990	1991-1995	1996-2000	2001-2005	2006-2010	d%*
	<1y											<1y											<1y
	IR(95%CI)	7.5(6.1-9.2)	6.8(5.2-9.0)	5.9(4.6-7.5)	4.9(3.8-6.3)	4.1(3.1-5.5)	4.1(3.1-5.5)	1.5(0.8-3.0)	0.392313			IR(95%CI)	7.1(5.3-9.5)	7.5(5.2-10.9)	4.4(2.9-6.5)	4.3(3.0-6.3)	4.3(2.9-6.4)	5.2(3.6-7.5)	0.7(0.2-3.0)	0.311246			IR(95%CI)	7.9(6.0-10.5)	6.0(4.0-9.2)	7.5(5.5-10.2)	5.5(3.9-7.7)	4.0(2.6-6.1)	3.0(1.8-4.9)	2.3(1.0-5.2)	0.49915
	Cases/PY	95/1,266,785	51/749,332	63/1,074,348	62/1,266,025	45/1,091,121	45/1,088,019	8/528,390				Cases/PY	46/649,625	29/384,394	24/551,670	28/648,119	24/559,499	29/558,101	2/270,996				Cases/PY	49/617,160	22/364,938	39/522,679	34/617,906	21/531,622	16/529,918	6/257,394
	1-4y											1-4y											1-4y
	IR(95%CI)	6.9(6.1-7.9)	4.5(3.8-5.3)	4.8(4.1-5.6)	4.0(3.5-4.6)	3.2(2.7-3.7)	3.7(3.2-4.4)	1.7(1.3-2.2)	0.174644			IR(95%CI)	7.2(6.0-8.5)	5.1(4.1-6.4)	5.1(4.2-6.3)	4.0(3.3-4.8)	3.7(3.0-4.6)	3.6(2.9-4.5)	2.0(1.4-2.8)	0.288393			IR(95%CI)	6.7(5.5-8.0)	3.9(3.0-5.0)	4.5(3.6-5.6)	4.1(3.4-5.0)	2.6(2.0-3.4)	3.8(3.1-4.8)	1.4(0.9-2.1)	0.0177288
	Cases/PY	239/3,449,109	138/3,058,682	163/3,384,480	198/4,910,974	149/4,690,805	158/4,242,980	55/3,190,121				Cases/PY	127/1,768,308	80/1,568,022	89/1,737,836	100/2,518,167	89/2,402,206	79/2,175,951	33/1,634,657				Cases/PY	112/1,680,801	58/1,490,661	74/1,646,644	98/2,392,807	60/2,288,599	79/2,067,028	22/1,555,464
	5-9y											5-9y											5-9y
	IR(95%CI)	6.1(4.7-8.1)	5.4(4.7-6.2)	4.1(3.5-4.8)	3.6(3.1-4.2)	3.2(2.8-3.7)	2.9(2.5-3.4)	1.8(1.4-2.2)	0.460376			IR(95%CI)	7.2(5.0-10.3)	6.8(5.7-8.0)	4.7(3.8-5.8)	4.2(3.4-5.1)	3.6(3.0-4.3)	3.2(2.6-3.9)	2.0(1.5-2.8)	0.52408			IR(95%CI)	5.0(3.2-7.8)	4.0(3.2-5.0)	3.4(2.7-4.4)	3.0(2.3-3.8)	2.9(2.3-3.5)	2.6(2.1-3.3)	1.5(1.0-2.1)	0.345764
	Cases/PY	50/814,773	207/3,834,508	154/3,755,087	159/4,407,527	197/6,112,342	166/5,698,443	71/4,014,512				Cases/PY	30/417,674	133/1,965,517	91/1,924,689	95/2,262,491	112/3,132,693	94/2,918,901	42/2,058,087				Cases/PY	20/397,099	74/1,868,990	63/1,830,398	64/2,145,036	85/2,979,650	72/2,779,543	29/1,956,425
	d%=(rate1981-1985-rate2001-2005)/rate1981-1985											d%=(rate1981-1985-rate2001-2005)/rate1981-1985											d%=(rate1981-1985-rate2001-2005)/rate1981-1985
