# Supplementary material for: Mortality in Children Aged 0-9 Years: A Nationwide Cohort Study from Three Nordic Countries
Source: PLoS One. 2016 Jan 8;11(1):e0146669. doi: 10.1371/journal.pone.0146669 (PMC4706349; doi:10.1371/journal.pone.0146669)
Supplement: S6 Table — (XLSX) [file pone.0146669.s006.xlsx]

## Sheet: S6 Table Nervous system
All	Table1 Mortality rates of disease of nervous system over age and calendar period										Boys	Table2 Mortality rates of disease of nervous system over age and calendar period in boys										Girls	Table3 Mortality rates of disease of nervous system over age and calendar period in girls
	Age group	1973-1980	1981-1985	1986-1990	1991-1995	1996-2000	2001-2005	2006-2010	d%*			Age group	1973-1980	1981-1985	1986-1990	1991-1995	1996-2000	2001-2005	2006-2010	d%*			Age group	1973-1980	1981-1985	1986-1990	1991-1995	1996-2000	2001-2005	2006-2010	d%*
	<1y											<1y											<1y
	IR(95%CI)	24.4(21.8-27.3)	18.1(15.3-21.5)	12.8(10.9-15.2)	12.7(10.9-14.8)	8.5(7.0-10.4)	8.9(7.3-10.9)	3.6(2.3-5.6)	0.508786			IR(95%CI)	28.3(24.5-32.7)	16.6(13.0-21.3)	12.5(9.9-15.8)	13.4(10.9-16.6)	9.7(7.4-12.6)	10.2(7.9-13.2)	3.3(1.7-6.4)	0.386578			IR(95%CI)	20.3(17.0-24.1)	19.7(15.7-24.9)	13.2(10.4-16.7)	12.0(9.5-15.0)	7.3(5.4-10.0)	7.5(5.5-10.3)	3.9(2.1-7.2)	0.617406
	Cases/PY	309/1,266,785	136/749,332	138/1,074,348	161/1,266,025	93/1,091,121	97/1,088,019	19/528,390				Cases/PY	184/649,625	64/384,394	69/551,670	87/648,119	54/559,499	57/558,101	9/270,996				Cases/PY	125/617,160	72/364,938	69/522,679	74/617,906	39/531,622	40/529,918	10/257,394
	1-4y											1-4y											1-4y
	IR(95%CI)	4.1(3.5-4.9)	3.0(2.4-3.7)	2.8(2.3-3.4)	2.2(1.8-2.6)	1.5(1.2-1.9)	1.9(1.5-2.3)	1.0(0.7-1.4)	0.37418			IR(95%CI)	4.4(3.5-5.4)	3.4(2.6-4.5)	3.1(2.4-4.1)	2.3(1.8-3.0)	1.9(1.4-2.5)	2.0(1.5-2.7)	0.6(0.3-1.1)	0.412833			IR(95%CI)	3.9(3.1-5.0)	2.5(1.8-3.4)	2.5(1.8-3.4)	2.0(1.5-2.6)	1.2(0.8-1.7)	1.7(1.2-2.4)	1.4(0.9-2.1)	0.317821
	Cases/PY	143/3,449,109	91/3,058,682	95/3,384,480	106/4,910,974	72/4,690,805	79/4,242,980	31/3,190,121				Cases/PY	77/1,768,308	54/1,568,022	54/1,737,836	59/2,518,167	45/2,402,206	44/2,175,951	10/1,634,657				Cases/PY	66/1,680,801	37/1,490,661	41/1,646,644	47/2,392,807	27/2,288,599	35/2,067,028	21/1,555,464
	5-9y											5-9y											5-9y
	IR(95%CI)	1.1(0.6-2.1)	1.1(0.8-1.5)	1.1(0.8-1.5)	0.9(0.7-1.2)	0.8(0.6-1.0)	0.8(0.6-1.1)	0.4(0.3-0.7)	0.2645			IR(95%CI)	0.5(0.1-1.9)	1.4(0.9-2.0)	1.2(0.8-1.9)	1.1(0.7-1.6)	1.1(0.7-1.5)	0.6(0.4-1.0)	0.4(0.2-0.8)	0.551083			IR(95%CI)	1.8(0.8-3.7)	0.9(0.5-1.4)	0.9(0.6-1.5)	0.7(0.4-1.2)	0.5(0.3-0.8)	1.0(0.7-1.5)	0.5(0.2-0.9)	-0.218742
	Cases/PY	9/814,773	43/3,834,508	41/3,755,087	40/4,407,527	48/6,112,342	47/5,698,443	18/4,014,512				Cases/PY	2/417,674	27/1,965,517	24/1,924,689	25/2,262,491	33/3,132,693	18/2,918,901	9/2,058,087				Cases/PY	7/397,099	16/1,868,990	17/1,830,398	15/2,145,036	15/2,979,650	29/2,779,543	9/1,956,425
	d%=(rate1981-1985-rate2001-2005)/rate1981-1985											d%=(rate1981-1985-rate2001-2005)/rate1981-1985											*d%=(rate1981-1985-rate2001-2005)/rate1981-1985
