# Supplementary material for: Mortality in Children Aged 0-9 Years: A Nationwide Cohort Study from Three Nordic Countries
Source: PLoS One. 2016 Jan 8;11(1):e0146669. doi: 10.1371/journal.pone.0146669 (PMC4706349; doi:10.1371/journal.pone.0146669)
Supplement: S7 Table — (XLSX) [file pone.0146669.s007.xlsx]

## Sheet: S7 Table Transport Accidents
All	Table2 Mortality rates of transport accidents over age and calendar period										Boys	Table2 Mortality rates of transport accidents over age and calendar period in boys										Girls	Table2 Mortality rates of transport accidents over age and calendar period in girls
	Age group	1973-1980	1981-1985	1986-1990	1991-1995	1996-2000	2001-2005	2006-2010	d%*			Age group	1973-1980	1981-1985	1986-1990	1991-1995	1996-2000	2001-2005	2006-2010	d%*			Age group	1973-1980	1981-1985	1986-1990	1991-1995	1996-2000	2001-2005	2006-2010	d%*
	<1y											<1y											<1y
	IR(95%CI)	2.4(1.7-3.5)	1.9(1.1-3.2)	2.0(1.3-3.1)	2.2(1.5-3.2)	2.0(1.3-3.1)	1.4(0.8-2.3)	0.2(0.0-1.3)	0.262094			IR(95%CI)	2.5(1.5-4.0)	2.3(1.2-4.5)	1.8(1.0-3.4)	2.2(1.3-3.6)	2.5(1.5-4.2)	2.0(1.1-3.6)	0	0.158189			IR(95%CI)	2.4(1.5-4.0)	1.4(0.6-3.3)	2.3(1.3-4.0)	2.3(1.3-3.8)	1.5(0.8-3.0)	0.8(0.3-2.0)	0.4(0.1-2.8)	0.449065
	Cases/PY	31/1,266,785	14/749,332	22/1,074,348	28/1,266,025	22/1,091,121	15/1,088,019	1/528,390				Cases/PY	16/649,625	9/384,394	10/551,670	14/648,119	14/559,499	11/558,101	0/270,996				Cases/PY	15/617,160	5/364,938	12/522,679	14/617,906	8/531,622	4/529,918	1/257,394
	1-4y											1-4y											1-4y
	IR(95%CI)	4.1(3.5-4.9)	3.3(2.7-4.0)	2.7(2.2-3.3)	1.9(1.6-2.3)	1.3(1.0-1.7)	1.3(1.0-1.7)	0.7(0.5-1.1)	0.600304			IR(95%CI)	5.1(4.2-6.3)	3.3(2.5-4.4)	2.8(2.1-3.7)	2.2(1.7-2.8)	1.6(1.2-2.2)	1.2(0.8-1.8)	0.8(0.5-1.4)	0.639693			IR(95%CI)	3.0(2.3-4.0)	3.3(2.5-4.3)	2.6(1.9-3.5)	1.6(1.2-2.2)	1.1(0.7-1.6)	1.5(1.0-2.1)	0.6(0.3-1.2)	0.558473
	Cases/PY	142/3,449,109	101/3,058,682	91/3,384,480	94/4,910,974	63/4,690,805	56/4,242,980	23/3,190,121				Cases/PY	91/1,768,308	52/1,568,022	49/1,737,836	55/2,518,167	38/2,402,206	26/2,175,951	13/1,634,657				Cases/PY	51/1,680,801	49/1,490,661	42/1,646,644	39/2,392,807	25/2,288,599	30/2,067,028	10/1,555,464
	5-9y											5-9y											5-9y
	IR(95%CI)	5.4(4.0-7.3)	3.8(3.3-4.5)	3.8(3.2-4.5)	2.6(2.2-3.1)	2.0(1.7-2.4)	1.2(1.0-1.6)	0.9(0.6-1.2)	0.674992			IR(95%CI)	6.0(4.0-8.9)	4.6(3.7-5.6)	4.3(3.4-5.3)	3.4(2.8-4.3)	2.6(2.1-3.3)	1.6(1.2-2.1)	0.9(0.6-1.4)	0.65583			IR(95%CI)	4.8(3.1-7.5)	3.0(2.4-4.0)	3.3(2.6-4.3)	1.7(1.2-2.4)	1.4(1.0-1.9)	0.9(0.6-1.3)	0.9(0.6-1.5)	0.705084
	Cases/PY	44/814,773	147/3,834,508	143/3,755,087	115/4,407,527	124/6,112,342	71/5,698,443	36/4,014,512				Cases/PY	25/417,674	90/1,965,517	82/1,924,689	78/2,262,491	83/3,132,693	46/2,918,901	18/2,058,087				Cases/PY	19/397,099	57/1,868,990	61/1,830,398	37/2,145,036	41/2,979,650	25/2,779,543	18/1,956,425
	*d%=(rate1981-1985-rate2001-2005)/rate1981-1985											*d%=(rate1981-1985-rate2001-2005)/rate1981-1985											*d%=(rate1981-1985-rate2001-2005)/rate1981-1985
